# Supplementary material
Source: MDPI journal article supplement (https://www.mdpi.com/2311-5637/9/4/333)
Supplement: s1 [file s1]

Table S1. The reagents used in the experiment.

| Number | Reagent                                                          | CAS        | Purity                                                                        | Manufacturer                          | Address         |
|--------|------------------------------------------------------------------|------------|-------------------------------------------------------------------------------|---------------------------------------|-----------------|
| 1      | 2,4,6-Tri(2-pyridyl)-1,3,5-triazine                              | 3682-35-7  | ≥98.5%                                                                        | Beijing suolaibao technology Co., Ltd | Beijing, China  |
| 2      | 1, 1-diphenyl-2-trinitrophenylhydrazine (DPPH)                   | 1898-66-4  | 96%                                                                           | Shanghai Macklin Biochemical Co., Ltd | Shanghai, China |
| 3      | 2,2'-hydrazine - di-3-ethylbenzothiazolin-6-sulfonic acid (ABTS) | 30931-67-0 | 98                                                                            | Shanghai Macklin Biochemical Co., Ltd | Shanghai, China |
| 4      | trichloroacetic acid                                             | 76-03-9    | ≥99%                                                                          | Sinopharm Chemical Reagent Co., Ltd   | Shanghai, China |
| 5      | bovine serum albumin                                             | 9048-46-8  | /                                                                             | Sinopharm Chemical Reagent Co., Ltd   | Shanghai, China |
| 6      | L-(+) -sualose 2,3,4,5, 6-pentacyl-2-hexenoyl-4-lactone          | 50-81-7    | ≥99.7%                                                                        | Sinopharm Chemical Reagent Co., Ltd   | Shanghai, China |
| 7      | Fucose (Fuc)                                                     | 2438-80-4  | ≥98%                                                                          | Sigma-Aldrich Co.                     | St. Louis, USA  |
| 8      | Rhamnose (Rha)                                                   | 10030-85-0 | ≥98%                                                                          | Sigma-Aldrich Co.                     | St. Louis, USA  |
| 9      | D-Glucosamine hydrochloride (GlcN)                               | 66-84-2    | ≥98%                                                                          | Sigma-Aldrich Co.                     | St. Louis, USA  |
| 10     | D-Galactoseamino HCl (GalN)                                      | 1772-03-8  | ≥98%                                                                          | Sigma-Aldrich Co.                     | St. Louis, USA  |
| 11     | Arabinose (Ara)                                                  | 5328-37-0  | ≥99%                                                                          | Sigma-Aldrich Co.                     | St. Louis, USA  |
| 12     | Galactose (Gal)                                                  | 26566-61-0 | ≥98%                                                                          | Sigma-Aldrich Co.                     | St. Louis, USA  |
| 13     | Glucose (Glc)                                                    | 50-99-7    | ≥98%                                                                          | Sigma-Aldrich Co.                     | St. Louis, USA  |
| 14     | Xylose (Xyl)                                                     | 58-86-6    | ≥98%                                                                          | Sigma-Aldrich Co.                     | St. Louis, USA  |
| 15     | Mannose (Man)                                                    | 3458-28-4  | ≥99%                                                                          | Sigma-Aldrich Co.                     | St. Louis, USA  |
| 16     | Ribose (Rib)                                                     | 50-69-1    | ≥98%                                                                          | Sigma-Aldrich Co.                     | St. Louis, USA  |
| 17     | Galacturonic acid (Gal-UA)                                       | 14982-50-4 | ≥98%                                                                          | Sigma-Aldrich Co.                     | St. Louis, USA  |
| 18     | Glucuronic acid (Glc-UA)                                         | 6556-12-3  | ≥99%                                                                          | Sigma-Aldrich Co.                     | St. Louis, USA  |
| 19     | 5-Methyl-2-phenyl-1,2-dihydropyrazol-3-one (PMP)                 | 19735-89-8 | ≥99%                                                                          | Sigma-Aldrich Co.                     | St. Louis, USA  |
| 20     | Trifluoroacetic acid (TFA)                                       | 76-05-1    | ≥99%                                                                          | Sigma-Aldrich Co.                     | St. Louis, USA  |
| 21     | Dextran                                                          | 9004-54-0  | for GPC, 1000, 5000, 12000,25000,50000,80000,150000,270000, 410000 and 670000 | Sigma-Aldrich Co.                     | St. Louis, USA  |
| 22     | Trolox                                                           | 53188-07-1 | ≥98%                                                                          | Beijing suolaibao technology Co., Ltd | Beijing, China  |
